# Supplementary material
Source: PubMed Central journal article supplement (PMC5926801)
Supplement: NIHMS960254-supplement-2.pdf [file NIHMS960254-supplement-2.pdf]

## SUPPORTING INFORMATION

### Kinetic Isotope Effects and Transition State Structure for Hypoxanthine-Guanine-Xanthine Phosphoribosyltransferase from *Plasmodium falciparum*

Rodrigo G. Ducati, Ross S. Firestone, and Vern L. Schramm\*

Department of Biochemistry, Albert Einstein College of Medicine, 1300 Morris Park Avenue, Bronx, New York 10461, United States

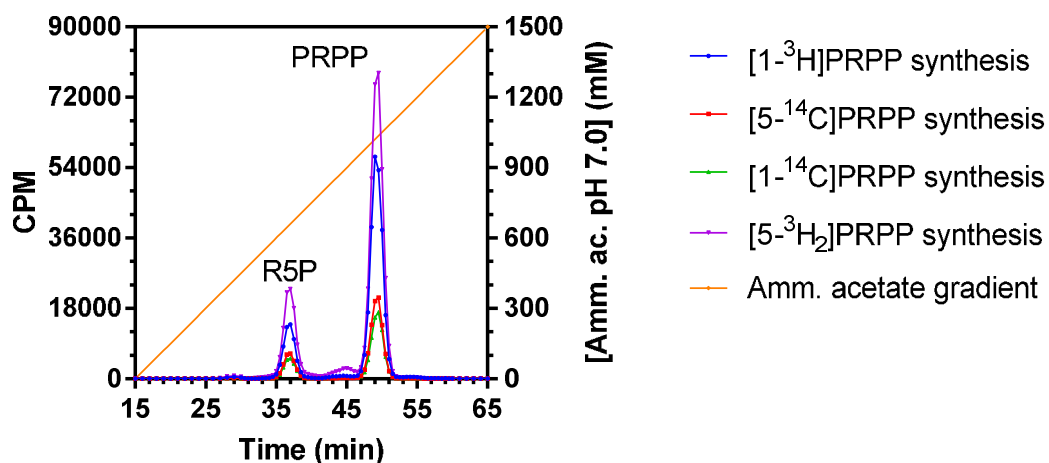

**Supporting Information Figure S1.** HPLC purification of radiolabeled PRPP synthesis. The R5P is the product of PRPP hydrolysis. This analysis demonstrates the labile properties of PRPP. PRPP, 5-phospho- $\alpha$ -D-ribose 1-pyrophosphate; R5P, ribose 5-phosphate.

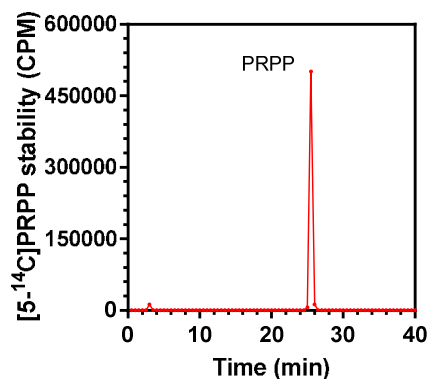

**Supporting Information Figure S2.** HPLC trace of radiolabeled PRPP following the purification and lyophilization processes used here to prepare PRPP for KIE analysis.

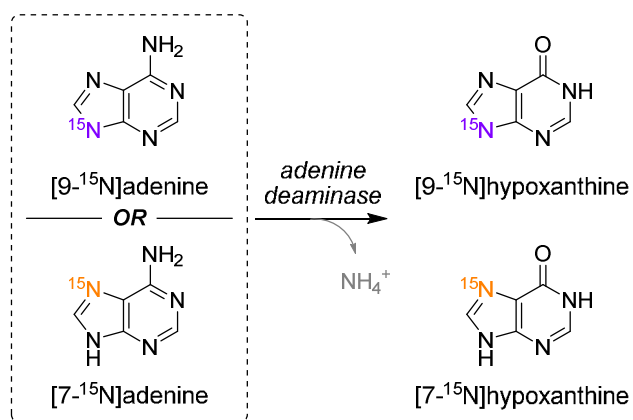

*Labels indicate how individual isotopes are incorporated into separate hypoxanthine molecules*

**Supporting Information Figure S3.** Synthesis of isotopically labeled hypoxanthine from adenine.

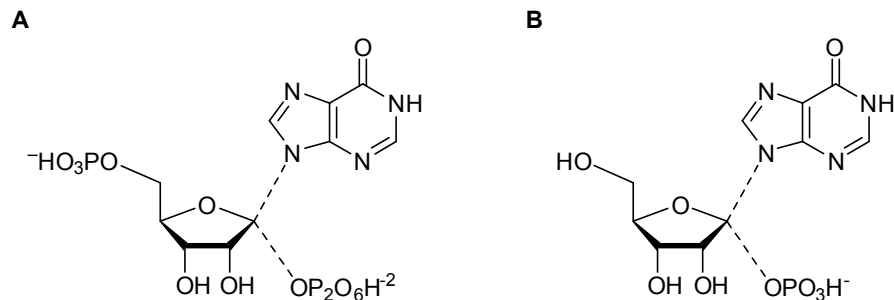

**Supporting Information Figure S4.** The full transition state (A) was simplified by truncating the 5-phosphate and the 1-pyrophosphate on PRPP (B).

TS

|   |             |             |             |
|---|-------------|-------------|-------------|
| C | -2.90565939 | 3.28337037  | -0.42449917 |
| O | -4.13939751 | 3.78479777  | 0.05060849  |
| C | -2.92775289 | 1.75501965  | -0.48445613 |
| C | -2.73595755 | 0.99195591  | 0.84935738  |
| O | -3.43482693 | -0.19821362 | 0.93588156  |
| C | -1.17316996 | 0.83215866  | 0.87068991  |
| O | -0.59747813 | -0.06834644 | 1.73581249  |
| C | -0.89882476 | 0.69324443  | -0.60971062 |
| N | 4.14205097  | -1.02476813 | 0.07296452  |
| C | 2.90822147  | -1.43949242 | -0.34790278 |
| N | 1.91333732  | -0.64319677 | -0.61407019 |
| C | 2.18447845  | 0.68395411  | -0.41037623 |
| C | 3.41564356  | 1.17276681  | 0.00538080  |
| C | 4.53844165  | 0.32216508  | 0.29119000  |
| O | 5.66000572  | 0.62568366  | 0.66340859  |
| N | 3.26426196  | 2.53768779  | 0.08496757  |
| C | 1.98017651  | 2.80995307  | -0.27156958 |
| H | -2.05472835 | 3.63836185  | 0.17968828  |
| H | -2.78183982 | 3.68067982  | -1.43591348 |
| H | -3.81064093 | 1.41121448  | -1.02518121 |
| H | -3.04693642 | 1.61977400  | 1.69434830  |
| H | -3.02302175 | -0.86792696 | 0.30984762  |
| H | -0.76598743 | 1.81994611  | 1.12981709  |
| H | -0.95783193 | -0.97985761 | 1.61137879  |
| H | -0.17948093 | 0.07714554  | -1.11625865 |
| H | 2.76672354  | -2.51161256 | -0.45335493 |
| H | 1.59080517  | 3.81853332  | -0.29535930 |
| O | -1.77218574 | 1.28848293  | -1.32891681 |
| N | 1.29180956  | 1.72108322  | -0.57700590 |
| H | 4.85840303  | -1.71809796 | 0.26356160  |
| O | -1.96675856 | -1.67619119 | -0.68246536 |
| P | -1.32341126 | -3.00630140 | -0.25611155 |
| O | -2.01384520 | -4.31226594 | -0.38495328 |
| O | 0.16575607  | -3.04182607 | -0.94195121 |
| O | -0.93341490 | -2.74986463 | 1.35869537  |
| H | -1.31117482 | -3.48170661 | 1.87176221  |
| H | 0.48834219  | -2.13000713 | -1.06179417 |
| H | -4.23868929 | 3.53708996  | 0.98320416  |
| H | 3.98058686  | 3.19671620  | 0.36035478  |

**Supporting Information Figure S5.** Atomic coordinates for the *Pf*HGXPR T transition state structure

GS Ribose 1-phosphate

|   |             |             |             |
|---|-------------|-------------|-------------|
| C | 2.88298090  | -1.15854098 | 0.47572696  |
| O | 3.83274378  | -1.12237006 | -0.57581431 |
| C | 1.56329132  | -0.65829653 | -0.10640680 |
| C | 1.57707784  | 0.81783957  | -0.49304455 |
| O | 0.74649935  | 1.03462867  | -1.63748788 |
| C | 0.94520097  | 1.51947428  | 0.73647401  |
| O | 0.31825538  | 2.73210862  | 0.38082338  |
| C | -0.02929344 | 0.44280295  | 1.26270373  |
| O | -3.56981000 | 0.05708275  | -0.36169860 |
| P | -2.20180049 | -0.43639258 | -0.16299432 |
| O | -1.30975704 | -0.76780849 | -1.45535034 |
| O | -2.09162959 | -1.77090606 | 0.72245661  |
| O | -1.29678462 | 0.68877642  | 0.64127677  |
| H | 3.18207025  | -0.52209280 | 1.32487892  |
| H | 2.72624819  | -2.17570998 | 0.86300920  |
| H | 1.27844085  | -1.28237253 | -0.95699219 |
| H | 2.59303727  | 1.16484492  | -0.70679048 |
| H | 0.48086607  | 1.97374281  | -1.57634629 |
| H | 1.71184797  | 1.72384427  | 1.49182732  |
| H | -0.64045320 | 2.54645811  | 0.36030099  |
| O | 0.54676615  | -0.79590116 | 0.93211302  |
| H | -0.19514867 | 0.45919210  | 2.34233388  |
| H | -0.66863729 | -0.04757338 | -1.68378905 |
| H | 4.66688132  | -1.49081363 | -0.24894682 |
| H | -1.15395806 | -2.02819242 | 0.81216019  |

**Supporting Information Figure S6.** Atomic coordinates for *Pj*HGXPR T reactant state structure for  $\alpha$ -D-ribose 1-phosphate.

GS Hypoxanthine

|   |             |             |             |
|---|-------------|-------------|-------------|
| N | 1.92123497  | 0.32248594  | -0.00001254 |
| C | 1.41758202  | 1.59085067  | -0.00001990 |
| N | 0.14786265  | 1.88297650  | 0.00010865  |
| C | -0.63266981 | 0.76665593  | 0.00017598  |
| C | -0.24534889 | -0.57422608 | -0.00001708 |
| C | 1.16421394  | -0.89877863 | 0.00004131  |
| O | 1.73803013  | -1.97207406 | -0.00013936 |
| N | -1.34475913 | -1.40529259 | 0.00020669  |
| C | -2.37138192 | -0.59023737 | -0.00020685 |
| H | 2.15030897  | 2.39390201  | -0.00019886 |
| H | -3.41057490 | -0.89149241 | 0.00015308  |
| N | -2.00387008 | 0.73911481  | 0.00017524  |
| H | 2.92610492  | 0.18435016  | -0.00006437 |
| H | -2.60773095 | 1.54925297  | -0.00196193 |

**Supporting Information Figure S7.** Atomic coordinates for the *Pf*HGXPRT reactant state structure for hypoxanthine.
